# Supplementary material for: Microbial Hotspots in Lithic Microhabitats Inferred from DNA Fractionation and Metagenomics in the Atacama Desert
Source: MDPI journal article supplement (doi:10.3390/microorganisms9051038), 2021-05-12
Supplement: s1 [file s1]

## Supplemental Material

Figures S1–S4:

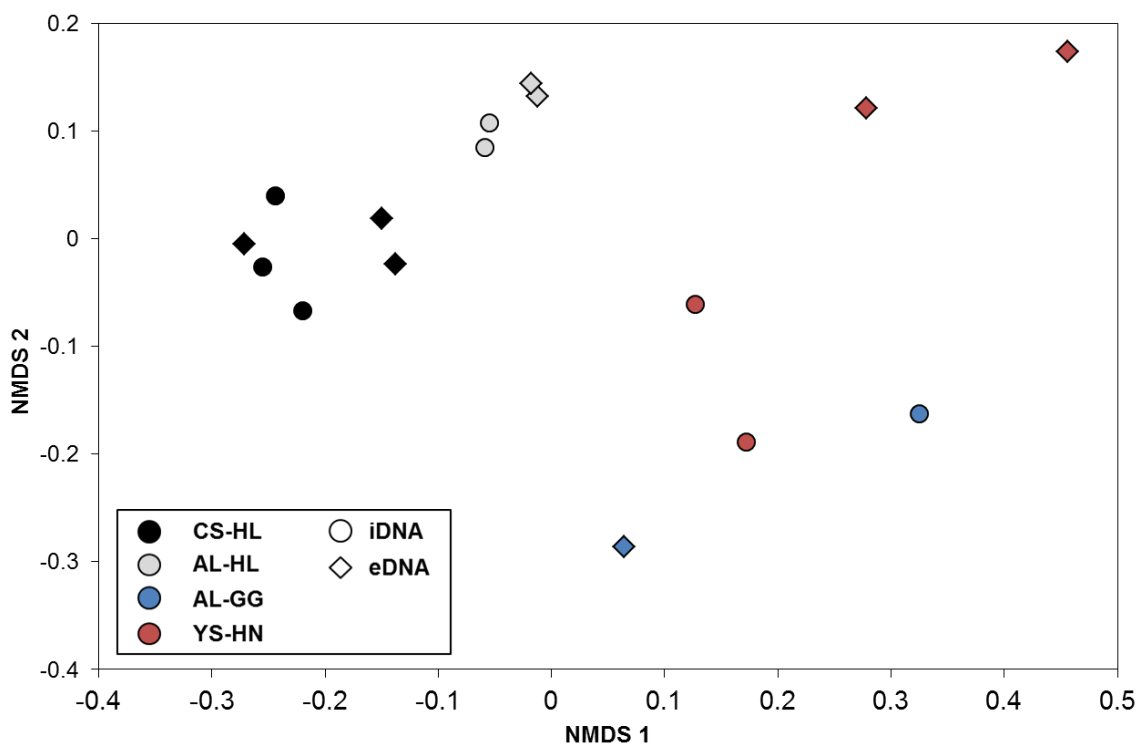

**Figure S1:** Nonmetric multidimensional scaling plot showing differences between of microbial eDNA and iDNA communities from four different Atacama Desert location representing three habitat types. CS-HL and AL-HL samples represent hypolith communities, AL-GG depicted gypsum crusts community and YS/HN depicts halite nodules communities

| Phylum              | Genus                                     | CS-HL |       | AL-HL |       | AL-GG |       | YS-HN |       |
|---------------------|-------------------------------------------|-------|-------|-------|-------|-------|-------|-------|-------|
|                     |                                           | eDNA  | iDNA  | eDNA  | iDNA  | eDNA  | iDNA  | eDNA  | iDNA  |
| Euryarchaeota       | Halococcus                                | 0.000 | 0.000 | 0.000 | 0.000 | 0.002 | 0.000 | 0.015 | 0.244 |
|                     | Halomarina                                | 0.000 | 0.000 | 0.000 | 0.000 | 0.000 | 0.000 | 0.000 | 0.023 |
|                     | Natronomonas                              | 0.000 | 0.000 | 0.000 | 0.000 | 0.000 | 0.000 | 0.000 | 0.011 |
|                     | Unclassified Halomicrobiaceae             | 0.000 | 0.000 | 0.000 | 0.000 | 0.000 | 0.000 | 0.000 | 0.046 |
|                     | Unclassified Halobacteriales              | 0.000 | 0.000 | 0.000 | 0.000 | 0.002 | 0.000 | 0.000 | 0.103 |
| Thaumarchaeota      | Unclassified Nitrososphaeraceae           | 0.000 | 0.000 | 0.000 | 0.007 | 0.000 | 0.013 | 0.000 | 0.000 |
| Actinobacteria      | Unclassified Actinomarinales              | 0.000 | 0.000 | 0.000 | 0.000 | 0.000 | 0.000 | 0.000 | 0.009 |
|                     | Uncultured Acidimicrobia IMCC26256        | 0.002 | 0.006 | 0.001 | 0.001 | 0.000 | 0.001 | 0.000 | 0.001 |
|                     | Acidimicrobia IMCC26256                   | 0.002 | 0.001 | 0.000 | 0.027 | 0.000 | 0.055 | 0.000 | 0.000 |
|                     | Uncultured Acidimicrobia                  | 0.014 | 0.013 | 0.003 | 0.017 | 0.000 | 0.033 | 0.001 | 0.000 |
|                     | Nocardia                                  | 0.004 | 0.013 | 0.039 | 0.013 | 0.007 | 0.009 | 0.026 | 0.004 |
|                     | Jatrophihabitans                          | 0.002 | 0.001 | 0.015 | 0.004 | 0.000 | 0.000 | 0.000 | 0.000 |
|                     | Blastococcus                              | 0.006 | 0.003 | 0.004 | 0.032 | 0.000 | 0.063 | 0.000 | 0.000 |
|                     | Uncultured Frankiales                     | 0.007 | 0.004 | 0.004 | 0.027 | 0.000 | 0.053 | 0.002 | 0.000 |
|                     | Quadrisphaera                             | 0.010 | 0.003 | 0.001 | 0.000 | 0.000 | 0.000 | 0.000 | 0.000 |
|                     | Brachybacterium                           | 0.000 | 0.000 | 0.000 | 0.001 | 0.038 | 0.001 | 0.001 | 0.000 |
|                     | Unclassified Intrasporangiaceae           | 0.000 | 0.000 | 0.000 | 0.000 | 0.002 | 0.000 | 0.014 | 0.000 |
|                     | Microbacterium                            | 0.000 | 0.000 | 0.000 | 0.000 | 0.011 | 0.000 | 0.009 | 0.000 |
|                     | Kribbella                                 | 0.007 | 0.002 | 0.000 | 0.000 | 0.000 | 0.000 | 0.000 | 0.000 |
|                     | Nocardioides                              | 0.015 | 0.008 | 0.009 | 0.002 | 0.001 | 0.000 | 0.002 | 0.000 |
|                     | Cutibacterium                             | 0.001 | 0.000 | 0.001 | 0.000 | 0.011 | 0.001 | 0.012 | 0.003 |
|                     | Unclassified Propionibacteriaceae         | 0.000 | 0.000 | 0.006 | 0.000 | 0.000 | 0.000 | 0.000 | 0.000 |
|                     | Crossiella                                | 0.001 | 0.000 | 0.000 | 0.015 | 0.000 | 0.029 | 0.000 | 0.000 |
|                     | Uncultured Euzeybyaceae                   | 0.009 | 0.004 | 0.012 | 0.004 | 0.000 | 0.000 | 0.000 | 0.001 |
|                     | Rubrobacter                               | 0.100 | 0.049 | 0.017 | 0.019 | 0.000 | 0.027 | 0.004 | 0.001 |
|                     | Conexibacter                              | 0.023 | 0.022 | 0.002 | 0.019 | 0.000 | 0.038 | 0.001 | 0.000 |
|                     | Solirubrobacter                           | 0.011 | 0.004 | 0.101 | 0.024 | 0.000 | 0.021 | 0.001 | 0.000 |
|                     | Unclassified Solirubrobacteraceae         | 0.004 | 0.001 | 0.039 | 0.011 | 0.000 | 0.019 | 0.000 | 0.000 |
|                     | Segetibacter                              | 0.002 | 0.003 | 0.004 | 0.070 | 0.000 | 0.133 | 0.000 | 0.000 |
|                     | Tunicatimonas                             | 0.011 | 0.007 | 0.000 | 0.000 | 0.000 | 0.000 | 0.000 | 0.000 |
|                     | Uncultured Cyclobacteriaceae              | 0.009 | 0.003 | 0.000 | 0.000 | 0.000 | 0.000 | 0.000 | 0.000 |
|                     | Rhodocytophaga                            | 0.018 | 0.010 | 0.002 | 0.002 | 0.000 | 0.000 | 0.000 | 0.000 |
|                     | Adhaeribacter                             | 0.008 | 0.005 | 0.002 | 0.001 | 0.000 | 0.000 | 0.000 | 0.000 |
|                     | Hymenobacter                              | 0.000 | 0.000 | 0.007 | 0.000 | 0.000 | 0.000 | 0.000 | 0.000 |
|                     | Pontibacter                               | 0.007 | 0.010 | 0.000 | 0.000 | 0.000 | 0.000 | 0.000 | 0.000 |
|                     | Unclassified Cytophagales                 | 0.000 | 0.000 | 0.012 | 0.002 | 0.000 | 0.000 | 0.000 | 0.000 |
|                     | Chryseobacterium                          | 0.000 | 0.000 | 0.000 | 0.000 | 0.034 | 0.000 | 0.001 | 0.000 |
|                     | Cloacibacterium                           | 0.001 | 0.000 | 0.000 | 0.001 | 0.037 | 0.001 | 0.031 | 0.001 |
|                     | Pedobacter                                | 0.007 | 0.003 | 0.000 | 0.000 | 0.000 | 0.000 | 0.000 | 0.000 |
|                     | Saibacter                                 | 0.000 | 0.000 | 0.000 | 0.000 | 0.004 | 0.000 | 0.000 | 0.131 |
| Chloroflexi         | Uncultured Kallotenuales AKW781           | 0.009 | 0.003 | 0.024 | 0.082 | 0.000 | 0.099 | 0.000 | 0.000 |
|                     | Thermobaculum                             | 0.004 | 0.003 | 0.002 | 0.014 | 0.000 | 0.028 | 0.000 | 0.000 |
|                     | Uncultured Thermomicrobiales AKYG1722     | 0.013 | 0.004 | 0.000 | 0.000 | 0.000 | 0.000 | 0.000 | 0.000 |
|                     | Uncultured Thermomicrobiales JG30-KF-CM45 | 0.064 | 0.018 | 0.038 | 0.020 | 0.000 | 0.022 | 0.001 | 0.000 |
| Cyanobacteria       | Aliterella CENA595                        | 0.290 | 0.526 | 0.026 | 0.017 | 0.000 | 0.002 | 0.004 | 0.000 |
|                     | Gloeocapsa PCC-7428                       | 0.023 | 0.017 | 0.000 | 0.000 | 0.000 | 0.000 | 0.000 | 0.000 |
|                     | Uncultured Chroococcidiopsaceae           | 0.006 | 0.006 | 0.000 | 0.000 | 0.000 | 0.000 | 0.000 | 0.000 |
|                     | Unclassified Chroococcidiopsaceae         | 0.016 | 0.019 | 0.430 | 0.233 | 0.000 | 0.000 | 0.003 | 0.001 |
|                     | Uncultured Nostocales                     | 0.005 | 0.010 | 0.008 | 0.052 | 0.000 | 0.000 | 0.000 | 0.000 |
|                     | Uncultured Nostocales                     | 0.000 | 0.000 | 0.007 | 0.040 | 0.000 | 0.000 | 0.000 | 0.000 |
|                     | Unclassified Nostocales                   | 0.009 | 0.005 | 0.001 | 0.000 | 0.005 | 0.000 | 0.000 | 0.316 |
|                     | Unclassified Oxyphotobacteria             | 0.044 | 0.043 | 0.021 | 0.002 | 0.000 | 0.000 | 0.001 | 0.004 |
| Deinococcus-Thermus | Deinococcus                               | 0.000 | 0.000 | 0.000 | 0.001 | 0.000 | 0.000 | 0.017 | 0.000 |
|                     | Truepera                                  | 0.038 | 0.039 | 0.014 | 0.005 | 0.000 | 0.001 | 0.001 | 0.000 |
| Firmicutes          | Anoxybacillus                             | 0.001 | 0.000 | 0.000 | 0.001 | 0.001 | 0.001 | 0.062 | 0.000 |
|                     | Unclassified Ruminococcaceae              | 0.000 | 0.000 | 0.000 | 0.000 | 0.000 | 0.000 | 0.009 | 0.000 |
| Gemmatimonadetes    | Uncultured Gemmatimonadaceae              | 0.000 | 0.000 | 0.000 | 0.000 | 0.000 | 0.000 | 0.008 | 0.000 |
| Patescibacteria     | Uncultured Saccharimonadales              | 0.005 | 0.002 | 0.000 | 0.006 | 0.000 | 0.013 | 0.000 | 0.000 |
| Proteobacteria      | Roseomonas                                | 0.000 | 0.001 | 0.001 | 0.001 | 0.000 | 0.001 | 0.011 | 0.000 |
|                     | Caulobacter                               | 0.000 | 0.000 | 0.000 | 0.001 | 0.065 | 0.002 | 0.004 | 0.000 |
|                     | Caulobacteraceae PMMR1                    | 0.012 | 0.010 | 0.000 | 0.000 | 0.000 | 0.000 | 0.000 | 0.000 |
|                     | Unclassified Caulobacteraceae             | 0.002 | 0.002 | 0.000 | 0.000 | 0.000 | 0.000 | 0.038 | 0.000 |
|                     | Methylobacterium                          | 0.001 | 0.002 | 0.002 | 0.020 | 0.138 | 0.038 | 0.009 | 0.003 |
|                     | Rhizobium                                 | 0.003 | 0.002 | 0.000 | 0.000 | 0.025 | 0.000 | 0.005 | 0.000 |
|                     | Unclassified Xanthobacteraceae            | 0.001 | 0.001 | 0.002 | 0.004 | 0.031 | 0.006 | 0.002 | 0.001 |
|                     | Uncultured Rhizobiales                    | 0.019 | 0.009 | 0.004 | 0.001 | 0.000 | 0.000 | 0.000 | 0.000 |
|                     | Paracoccus                                | 0.000 | 0.000 | 0.001 | 0.006 | 0.001 | 0.011 | 0.028 | 0.002 |
|                     | Sphingomonas                              | 0.005 | 0.003 | 0.005 | 0.006 | 0.003 | 0.010 | 0.001 | 0.001 |
|                     | Uncultured Sphingomonadaceae              | 0.008 | 0.008 | 0.001 | 0.000 | 0.002 | 0.000 | 0.000 | 0.000 |
|                     | Unclassified Sphingomonadaceae            | 0.027 | 0.022 | 0.001 | 0.011 | 0.000 | 0.023 | 0.001 | 0.000 |
|                     | Acidovorax                                | 0.000 | 0.000 | 0.000 | 0.000 | 0.035 | 0.000 | 0.018 | 0.002 |
|                     | Delftia                                   | 0.000 | 0.000 | 0.000 | 0.007 | 0.000 | 0.014 | 0.000 | 0.000 |
|                     | Herbaspirillum                            | 0.000 | 0.000 | 0.000 | 0.000 | 0.041 | 0.000 | 0.000 | 0.000 |
|                     | Methylobacillus                           | 0.000 | 0.000 | 0.000 | 0.000 | 0.014 | 0.000 | 0.000 | 0.000 |
|                     | Unclassified Methylophilaceae             | 0.005 | 0.009 | 0.013 | 0.081 | 0.300 | 0.150 | 0.302 | 0.015 |
|                     | Uncultured Neisseriaceae                  | 0.000 | 0.000 | 0.000 | 0.000 | 0.001 | 0.000 | 0.000 | 0.010 |
|                     | Enterobacter                              | 0.000 | 0.000 | 0.000 | 0.000 | 0.000 | 0.000 | 0.006 | 0.000 |
|                     | Acidibacter                               | 0.000 | 0.000 | 0.000 | 0.000 | 0.000 | 0.000 | 0.005 | 0.000 |
|                     | Acinetobacter                             | 0.002 | 0.002 | 0.003 | 0.005 | 0.064 | 0.008 | 0.160 | 0.002 |
|                     | Enhydrobacter                             | 0.000 | 0.001 | 0.001 | 0.000 | 0.001 | 0.000 | 0.010 | 0.001 |
|                     | Pseudomonas                               | 0.001 | 0.001 | 0.001 | 0.003 | 0.002 | 0.006 | 0.099 | 0.004 |
|                     | Uncultured Steroidobacteraceae            | 0.000 | 0.000 | 0.000 | 0.000 | 0.015 | 0.000 | 0.000 | 0.000 |
|                     | Pseudoxanthomonas                         | 0.000 | 0.000 | 0.000 | 0.000 | 0.050 | 0.000 | 0.000 | 0.000 |
| Verrucomicrobia     | Candidatus Udaeobacter                    | 0.006 | 0.001 | 0.000 | 0.000 | 0.000 | 0.000 | 0.000 | 0.000 |
| Unassigned          | Unassigned                                | 0.001 | 0.002 | 0.000 | 0.001 | 0.000 | 0.000 | 0.021 | 0.000 |

**Figure S2:** Genus level taxonomy depicting relative abundances of the eDNA and iDNA pools across the four sampled habitats

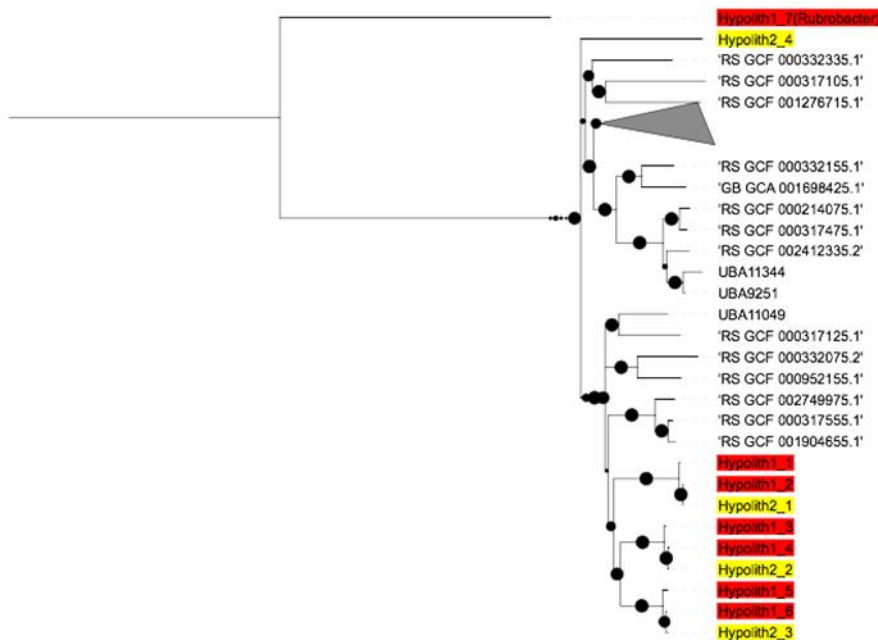

**Figure S3:** Phylogenetic tree showing classification of 16S rRNA genes recovered from metagenome assembled genomes (MAGs) reconstructed from hypolith samples

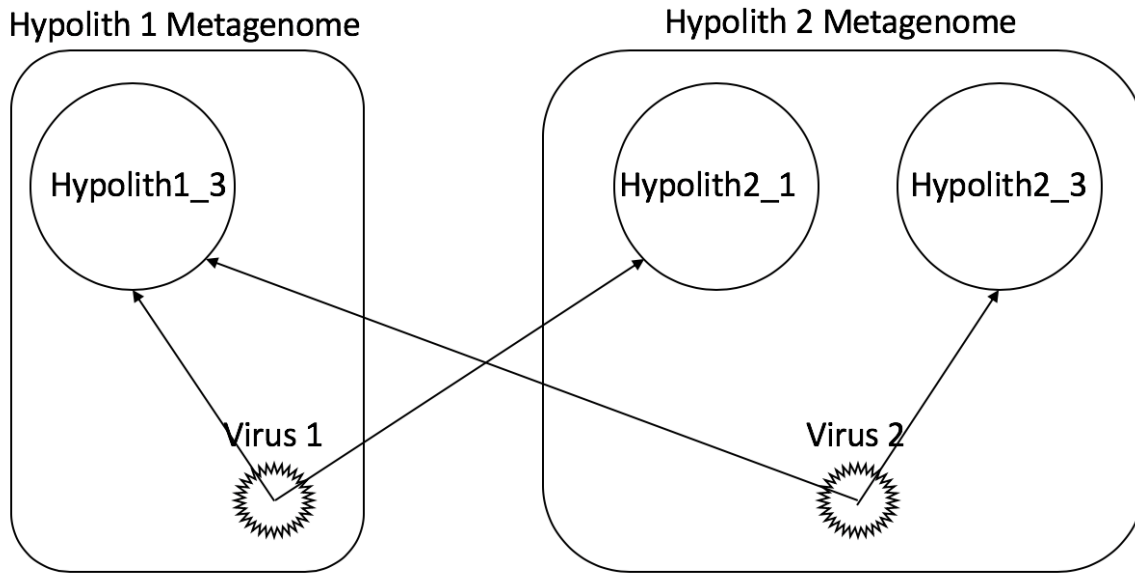

**Figure S4:** Visualization of putative host-virus interaction across two hypolith metagenomes. An arrow between a virus and a genome indicates that a spacer to viral contig match was found

**Tables S1–S3:**

**Table S1:** Sequence and alpha diversity measurements

| Sample           | Generated sequences | Sequences post trimming and contamination removal | Number of ASVs (rarefied to 69,772 seqs) | Shannon Diversity Index (rarefied to 69,772 seqs) |
|------------------|---------------------|---------------------------------------------------|------------------------------------------|---------------------------------------------------|
| CS-HL eDNA Rep 1 | 521,452             | 188,376                                           | 729                                      | 4.47                                              |
| CS-HL eDNA Rep 2 | 494,292             | 264,312                                           | 667                                      | 4.58                                              |
| CS-HL eDNA Rep 3 | 510,660             | 291,928                                           | 558                                      | 3.76                                              |
| CS-HL iDNA Rep 1 | 325,916             | 168,192                                           | 587                                      | 2.85                                              |
| CS-HL iDNA Rep 2 | 793,588             | 503,980                                           | 642                                      | 4.01                                              |
| CS-HL iDNA Rep 3 | 617,700             | 391,548                                           | 568                                      | 2.40                                              |
| AL-HL eDNA Rep 1 | 819,564             | 598,292                                           | 525                                      | 3.57                                              |
| AL-HL eDNA Rep 2 | 697,448             | 411,884                                           | 565                                      | 3.45                                              |
| AL-HL iDNA Rep 1 | 626,244             | 421,228                                           | 506                                      | 3.26                                              |
| AL-HL iDNA Rep 2 | 778,264             | 456,408                                           | 392                                      | 2.51                                              |
| AL-GG eDNA       | 263,188             | 69,772                                            | 207                                      | 3.02                                              |
| AI-GG iDNA       | 241,720             | 107,788                                           | 297                                      | 3.45                                              |
| YS-HN eDNA Rep 1 | 326,976             | 151,660                                           | 289                                      | 3.39                                              |
| YS-HN eDNA Rep 2 | 395,972             | 140,512                                           | 358                                      | 2.43                                              |
| YS-HN iDNA Rep 1 | 560,532             | 282,920                                           | 378                                      | 2.91                                              |
| YS-HN iDNA Rep 2 | 280,636             | 280,636                                           | 199                                      | 2.69                                              |

**Table S2.** Estimation of Metagenome Assembled Genome (MAG) quality and RpS3 protein based taxonomy for all MAGs studied

| MAG         | CheckM Statistics |                   |                          | Taxonomy (based on Ribosomal Protein S3)                                              |
|-------------|-------------------|-------------------|--------------------------|---------------------------------------------------------------------------------------|
|             | Completeness (%)  | Contamination (%) | Strain heterogeneity (%) |                                                                                       |
| Hypolith1_1 | 99.26             | 2.67              | 7.69                     | Bacteria;Cyanobacteria;Chroococcidiopsidales;Chroococcidiopsidaceae;Chroococcidiopsis |
| Hypolith1_2 | 93.48             | 3.37              | 13.04                    | Bacteria;Cyanobacteria;unclassified;unclassified;unclassified;                        |
| Hypolith1_3 | 82.11             | 2.30              | 23.08                    | Bacteria;Cyanobacteria;Chroococcidiopsidales;Chroococcidiopsidaceae;Chroococcidiopsis |
| Hypolith1_4 | 82.97             | 0.79              | 0.00                     | Bacteria;Actinobacteria;Rubrobacteria;Rubrobacterales;Rubrobacter;                    |
| Hypolith1_5 | 69.46             | 1.66              | 0.00                     | Bacteria;Cyanobacteria;Oscillatoriothycideae;Oscillatoriales;unclassified;            |
| Hypolith1_6 | 66.54             | 0.44              | 0.00                     | Bacteria;Actinobacteria;Rubrobacteria;Rubrobacterales;Rubrobacter;                    |
| Hypolith1_7 | 49.53             | 2.36              | 0.00                     | Bacteria;Chloroflexi;unclassified;unclassified;unclassified;                          |
| Hypolith1_8 | 33.45             | 0.00              | 0.00                     | No rpS3                                                                               |
| Hypolith2_1 | 99.41             | 3.84              | 9.09                     | Bacteria;Cyanobacteria;Chroococcidiopsidales;Chroococcidiopsidaceae;Chroococcidiopsis |
| Hypolith2_2 | 90.74             | 0.71              | 0.00                     | Bacteria;Cyanobacteria;Oscillatoriothycideae;Oscillatoriales;Oscillatoriaceae;Moorea  |
| Hypolith2_3 | 86.37             | 3.07              | 0.00                     | Bacteria;Cyanobacteria;unclassified;unclassified;unclassified;                        |
| Hypolith2_4 | 96.04             | 1.33              | 0.00                     | Bacteria;Cyanobacteria;Chroococcidiopsidales;Chroococcidiopsidaceae;Chroococcidiopsis |
| Hypolith2_5 | 55.71             | 1.87              | 12.50                    | Bacteria;Actinobacteria;Rubrobacteria;Rubrobacterales;Rubrobacter;                    |
| Hypolith2_6 | 46.84             | 0.61              | 0.00                     | Bacteria;Cyanobacteria;Oscillatoriothycideae;Chroococcales;Gloeocapsa;                |
| Hypolith2_7 | 34.12             | 0.22              | 0.00                     | Bacteria;Cyanobacteria;unclassified;unclassified;unclassified;                        |
| Hypolith2_8 | 17.51             | 0.00              | 0.00                     | No rpS3                                                                               |
| Hypolith2_9 | 13.91             | 0.00              | 0.00                     | Bacteria;Cyanobacteria;unclassified;unclassified;unclassified;                        |

**Table S3:** All population genomes binned and their checkM statistics and predicted taxonomy based on rpS3.

| MAG         | CheckM Statistics |                   |                          | 51 Bacterial Single Copy Genes |                   | Genome Statistics |            |                |          |           |       |  | Taxonomy (based on Ribosomal Protein S3)                                              |
|-------------|-------------------|-------------------|--------------------------|--------------------------------|-------------------|-------------------|------------|----------------|----------|-----------|-------|--|---------------------------------------------------------------------------------------|
|             | Completeness (%)  | Contamination (%) | Strain heterogeneity (%) | Completeness (%)               | Contamination (%) | iRep              | Size (Mbp) | GC content (%) | Coverage | Scaffolds | N50   |  |                                                                                       |
| Hypolith1_1 | 99.26             | 2.67              | 7.69                     | 98                             | 3.9               | 1.452             | 6.0        | 44.23          | 26.97    | 292       | 86602 |  | Bacteria;Cyanobacteria;Chroococcidiopsidales;Chroococcidiopsidaceae;Chroococcidiopsis |
| Hypolith1_2 | 93.48             | 3.37              | 13.04                    | 98                             | 1.9               | 1.750             | 5.4        | 46.65          | 30.19    | 691       | 15589 |  | Bacteria;Cyanobacteria;unclassified;unclassified;unclassified;                        |
| Hypolith1_3 | 82.11             | 2.30              | 23.08                    | 98                             | 1.9               | 1.654             | 4.9        | 46.40          | 11.68    | 360       | 15245 |  | Bacteria;Cyanobacteria;Chroococcidiopsidales;Chroococcidiopsidaceae;Chroococcidiopsis |
| Hypolith1_4 | 82.97             | 0.79              | 0.00                     | 92                             | 5.9               | 2.034             | 4.3        | 67.89          | 5.58     | 281       | 26507 |  | Bacteria;Actinobacteria;Rubrobacteria;Rubrobacterales;Rubrobacter;                    |
| Hypolith2_1 | 99.41             | 3.84              | 9.09                     | 98                             | 5.8               | 1.716             | 7.8        | 44.56          | 14.65    | 708       | 64242 |  | Bacteria;Cyanobacteria;Chroococcidiopsidales;Chroococcidiopsidaceae;Chroococcidiopsis |
| Hypolith2_2 | 90.74             | 0.71              | 0.00                     | 96                             | 3.9               | 1.681             | 3.6        | 50.92          | 5.91     | 227       | 35294 |  | Bacteria;Cyanobacteria;Oscillatoriothycideae;Oscillatoriales;Oscillatoriaceae;Moorea  |
| Hypolith2_3 | 86.37             | 3.07              | 0.00                     | 96                             | 0.0               | 1.780             | 6.6        | 47.98          | 5.74     | 740       | 19297 |  | Bacteria;Cyanobacteria;unclassified;unclassified;unclassified;                        |
| Hypolith2_4 | 96.04             | 1.33              | 0.00                     | 98                             | 3.9               | 1.856             | 5.2        | 46.02          | 37.66    | 962       | 8550  |  | Bacteria;Cyanobacteria;Chroococcidiopsidales;Chroococcidiopsidaceae;Chroococcidiopsis |
